# Supplementary material for: Predicting Survival in Patients With Acute Decompensated Heart Failure Complicated by Cardiogenic Shock
Source: Research Square preprint supplement (doi:10.21203/rs.3.rs-111263/v1), 2020-11-20

**Appendix Table 1. Performance of the ALC score in the derivation sample and at internal and external validation.**

|  | Derivation sample | | Validation sample |
| --- | --- | --- | --- |
| PERFORMANCE | development | Internal validation | External validation |
| *Overall* |  |  |  |
| Brier | 0.1596 | 0.1770 | 0.227 |
| *Discrimination* |  |  |  |
| C stat | 0.821 | 0.799 | 0.660 |
| *Calibration* |  |  |  |
| Calibration in the large | 0 | -0.0557 | -0.635 |
| Calibration slope | 1 | 0.8971 | 0.486 |

**Appendix Figure 1. Decision curve analysis. Net benefit of using a model to predict 28-day mortality**


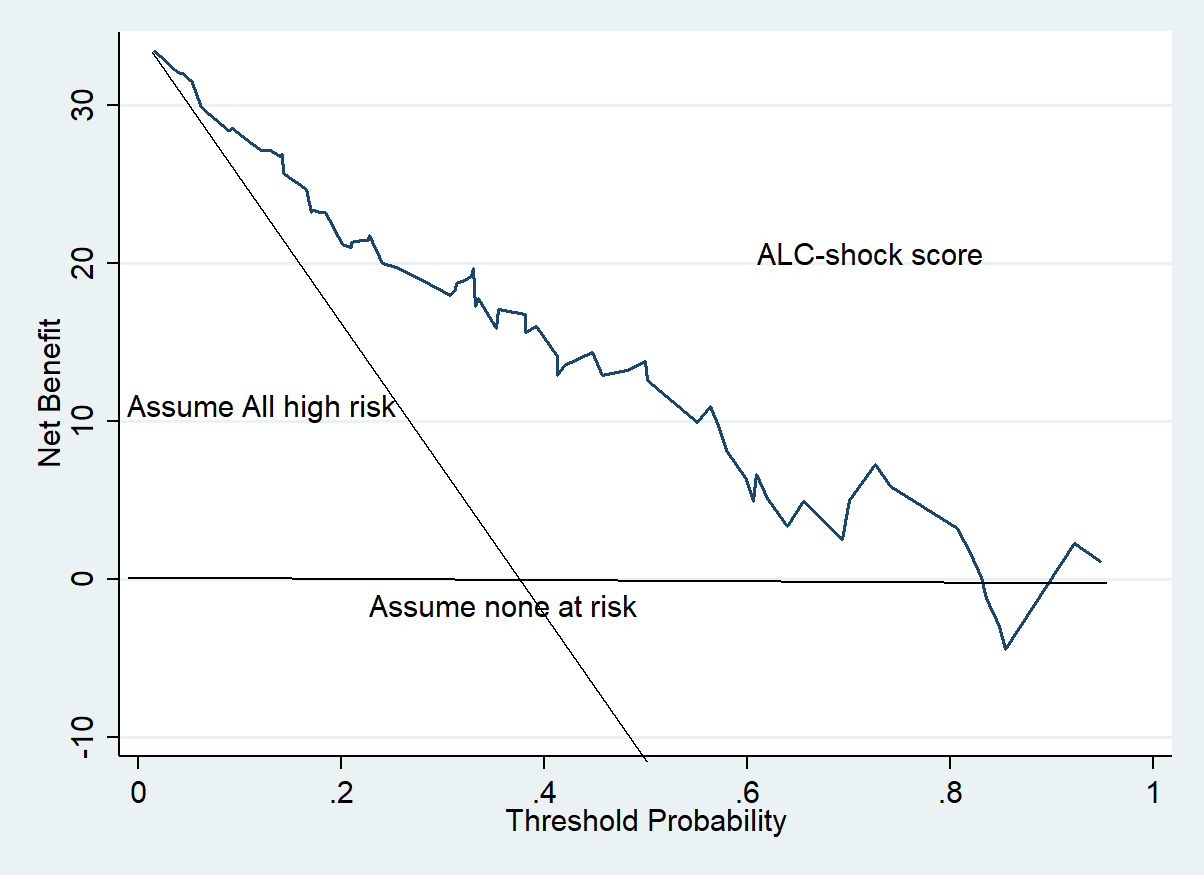

Supplement: Supplementary file 1 [file f63e48f6a1816c7bf86d5bdd.docx]
